# Supplementary material for: Maternal Body Mass Index and Risk of Autism Spectrum Disorders in Offspring: A Meta-analysis
Source: PubMed Central journal article supplement (PMC5043237; doi:10.1038/srep34248), 2016-09-30
Supplement: srep34248-s1.pdf [file srep34248-s1.pdf]

# Maternal Body Mass Index and Risk of Autism Spectrum Disorders in Offspring:

## A Meta-analysis

Author: Ying Wang, Shiming Tang, Shunsheng Xu, Shenhong Weng, Zhongchun Liu\*

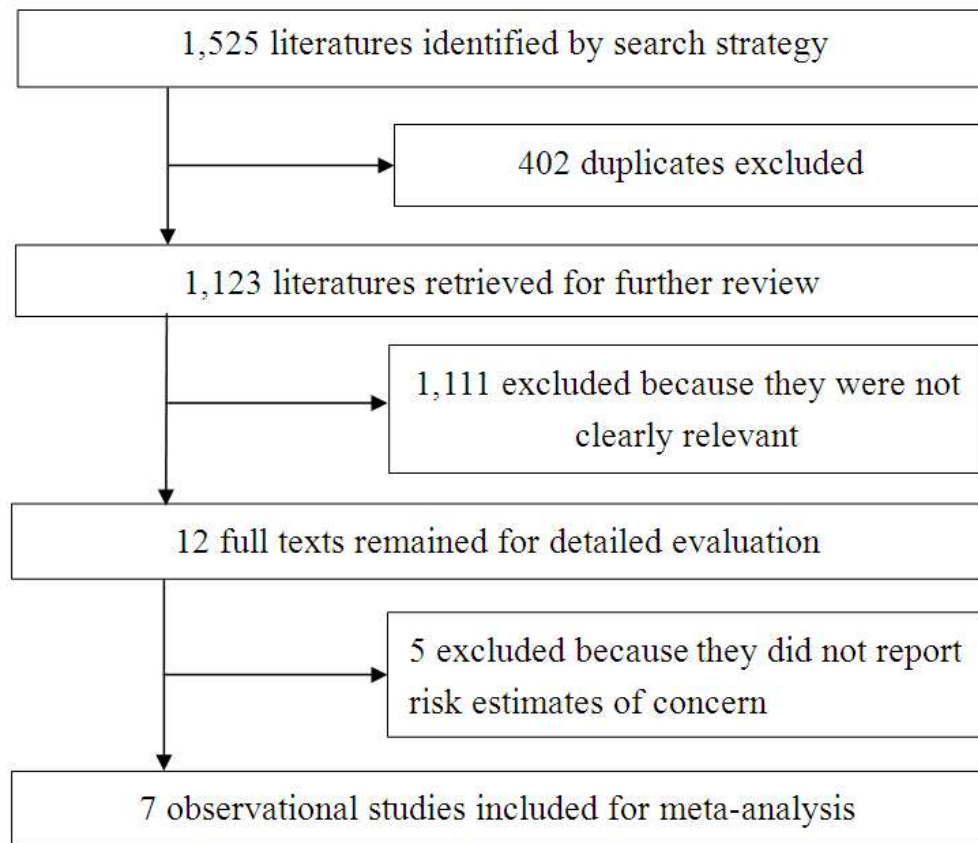

**Supplemental figure 1.** Flow diagram of the study selection process

**Supplemental table 1.** Methodologic quality of cohort studies included in the meta-analysis

| Study                        | Representativeness of the exposed cohort | Selection of the unexposed cohort | Ascertainment of exposure | Outcome of interest not present at start of study | Control for important factor or additional factor <sup>1</sup> | Outcome assessment        | Follow-up long enough for outcomes to occur         | Adequacy of follow-up of cohorts | Total quality scores |
|------------------------------|------------------------------------------|-----------------------------------|---------------------------|---------------------------------------------------|----------------------------------------------------------------|---------------------------|-----------------------------------------------------|----------------------------------|----------------------|
| Lyll 2011 <sup>28</sup>      | 1                                        | 1                                 | 1                         | 1                                                 | 2                                                              | 0                         | 1                                                   | 1                                | 8                    |
| Moss 2014 <sup>9</sup>       | 1                                        | 1                                 | 0                         | 1                                                 | 2                                                              | 0                         | 1                                                   | 1                                | 7                    |
| Surén 2014 <sup>29</sup>     | 1                                        | 1                                 | 1                         | 1                                                 | 1                                                              | 1                         | 1                                                   | 1                                | 8                    |
| Reynolds 2014 <sup>25</sup>  | 1                                        | 1                                 | 1                         | 1                                                 | 2                                                              | 1                         | 1                                                   | 1                                | 9                    |
| Gardner 2015 <sup>8</sup>    | 1                                        | 1                                 | 1                         | 1                                                 | 2                                                              | 1                         | 1                                                   | 1                                | 9                    |
| Xiang 2015 <sup>7</sup>      | 1                                        | 1                                 | 1                         | 1                                                 | 1                                                              | 1                         | 1                                                   | 1                                | 8                    |
| Study                        | Is the case definition adequate          | Representativeness of the cases   | Selection of Controls     | Definition of Controls                            | Comparability of cases and controls <sup>2</sup>               | Ascertainment of exposure | Same method of ascertainment for cases and controls | Non-Response rate                | Total quality scores |
| Krakowiak 2012 <sup>27</sup> | 1                                        | 1                                 | 1                         | 1                                                 | 2                                                              | 1                         | 0                                                   | 1                                | 8                    |

<sup>1,2</sup> A maximum of 2 points were assigned to this item.
